# Supplementary material for: A bibliographic review of public health dissemination and implementation research output and citation rates
Source: PubMed Central journal article supplement — Prev Med Rep. 2016 Aug 8;4:441–3. doi: 10.1016/j.pmedr.2016.08.006 (PMC4995384; doi:10.1016/j.pmedr.2016.08.006), 2016-08-08
Supplement: mmc1.pdf [file mmc1.pdf]

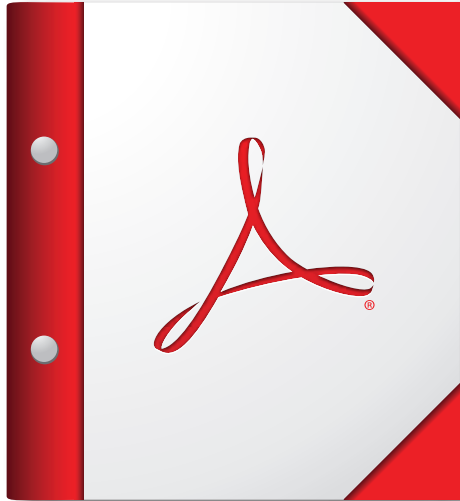

**For the best experience, open this PDF portfolio in  
Acrobat 9 or Adobe Reader 9, or later.**

[Get Adobe Reader Now!](#)
